# Supplementary material for: Fusarium Species and Mycotoxins Associated with Sorghum Grains in Uruguay
Source: MDPI journal article supplement (doi:10.3390/toxins15080484), 2023-07-31
Supplement: s1 [file s1]

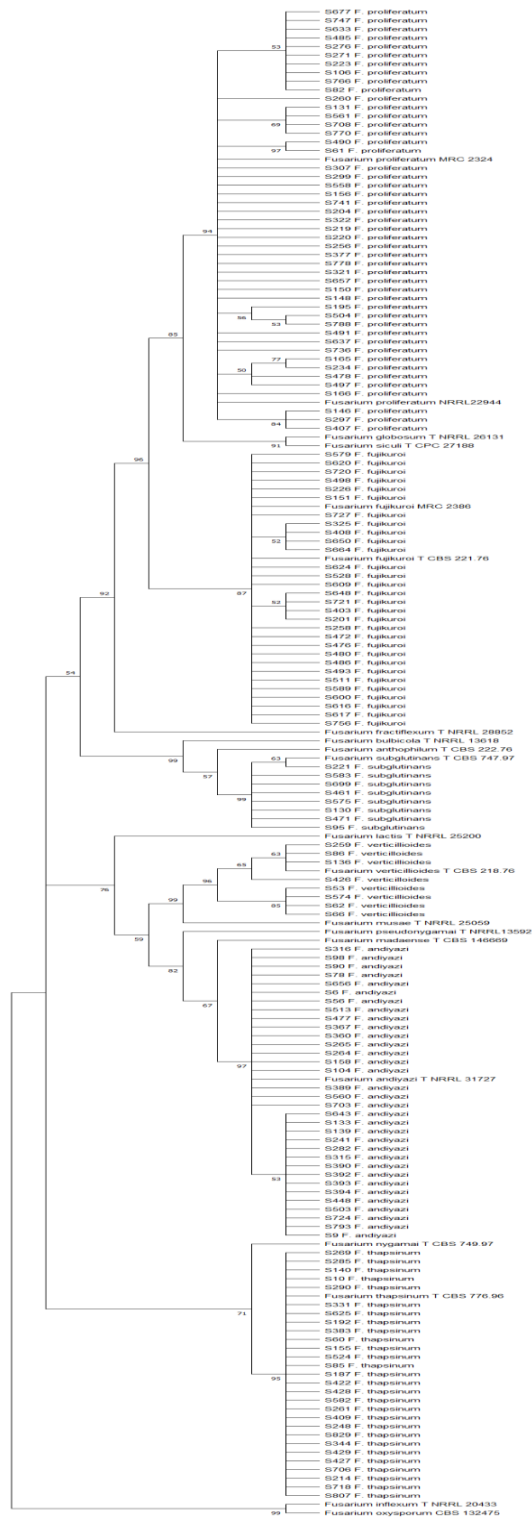

**Figure S1:** Maximum likelihood tree inferred from the transcription elongation factor gene (*TEF 1-α*) sequences of species belonging to the *Fusarium fujikuroi* species complex (FFSC).

Table S1: GenBank accession numbers of the FFSC used in phylogenetic analysis.

| Species                | Collection | TEF1a    | Species                | Collection | TEF1a    |
|------------------------|------------|----------|------------------------|------------|----------|
| <i>F. proliferatum</i> | MRC 2324   | MH582344 | <i>F. fujikuroi</i>    | MRC 2386   | MH582339 |
|                        | NRRL 22944 | AF160280 |                        | CBS 221.76 | MN534010 |
|                        | S131       | OQ702205 |                        | S201       | OQ702134 |
|                        | S148       | OQ702206 |                        | S403       | OQ702135 |
|                        | S234       | OQ702215 |                        | S408       | OQ702136 |
|                        | S256       | OQ702216 |                        | S472       | OQ702137 |
|                        | S260       | OQ702217 |                        | S498       | OQ702138 |
|                        | S271       | OQ702218 |                        | S620       | OQ702139 |
|                        | S276       | OQ702219 |                        | S624       | OQ702140 |
|                        | S297       | OQ702220 |                        | S648       | OQ702141 |
|                        | S307       | OQ702221 |                        | S650       | OQ702142 |
|                        | S321       | OQ702222 |                        | S664       | OQ702143 |
|                        | S322       | OQ702223 |                        | S151       | OQ702144 |
|                        | S377       | OQ702224 |                        | S226       | OQ702145 |
|                        | S407       | OQ702225 |                        | S258       | OQ702146 |
|                        | S478       | OQ702226 |                        | S325       | OQ702147 |
|                        | S485       | OQ702227 |                        | S476       | OQ702148 |
|                        | S491       | OQ702228 |                        | S480       | OQ702149 |
|                        | S497       | OQ702229 |                        | S486       | OQ702150 |
|                        | S504       | OQ702230 |                        | S493       | OQ702151 |
|                        | S633       | OQ702231 |                        | S511       | OQ702152 |
|                        | S637       | OQ702232 |                        | S528       | OQ702153 |
|                        | S657       | OQ702233 |                        | S579       | OQ702154 |
|                        | S677       | OQ702234 |                        | S589       | OQ702155 |
|                        | S708       | OQ702235 |                        | S600       | OQ702156 |
|                        | S736       | OQ702236 |                        | S609       | OQ702157 |
|                        | S741       | OQ702237 |                        | S616       | OQ702158 |
|                        | S747       | OQ702238 |                        | S617       | OQ702159 |
|                        | S766       | OQ702239 |                        | S720       | OQ702160 |
|                        | S770       | OQ702240 |                        | S721       | OQ702161 |
|                        | S778       | OQ702241 |                        | S727       | OQ702162 |
|                        | S788       | OQ702242 |                        | S756       | OQ702163 |
|                        | S82        | OQ702243 | <i>F. subglutinans</i> | CBS 747.97 | MW402150 |
|                        | S61        | OQ702244 |                        | S130       | OQ702172 |
|                        | S490       | OQ702245 |                        | S221       | OQ702173 |
|                        | S146       | OQ702246 |                        | S461       | OQ702174 |
|                        | S299       | OQ702247 |                        | S471       | OQ702175 |
|                        | S558       | OQ702248 |                        | S575       | OQ702176 |
|                        | S204       | OQ702249 |                        | S583       | OQ702177 |
|                        | S561       | OQ702250 |                        | S95        | OQ702178 |
|                        |            |          |                        |            |          |
|                        |            |          |                        |            |          |
| Species                | Collection | TEF1a    | Species                | Collection | TEF1a    |
| <i>F. thapsinum</i>    | CBS 776.96 | MN534044 | <i>F. andiyazi</i>     | S392       | OQ656390 |
|                        | S10        | OQ702179 |                        | S393       | OQ656391 |
|                        | S140       | OQ702180 |                        | S394       | OQ656392 |
|                        | S155       | OQ702181 |                        | S448       | OQ656393 |
|                        | S187       | OQ702182 |                        | S477       | OQ656394 |

|                    |            |          |                           |            |          |
|--------------------|------------|----------|---------------------------|------------|----------|
|                    | S248       | OQ702183 |                           | S503       | OQ656395 |
|                    | S261       | OQ702184 |                           | S513       | OQ656396 |
|                    | S269       | OQ702185 |                           | S56        | OQ656397 |
|                    | S285       | OQ702186 |                           | S560       | OQ656398 |
|                    | S290       | OQ702187 |                           | S6         | OQ656399 |
|                    | S331       | OQ702188 |                           | S643       | OQ656400 |
|                    | S344       | OQ702189 |                           | S656       | OQ656401 |
|                    | S383       | OQ702190 |                           | S703       | OQ656402 |
|                    | S422       | OQ702191 |                           | S724       | OQ656403 |
|                    | S427       | OQ702192 |                           | S78        | OQ656404 |
|                    | S524       | OQ702193 |                           | S793       | OQ656405 |
|                    | S582       | OQ702194 |                           | S9         | OQ656406 |
|                    | S60        | OQ702195 |                           | S90        | OQ656407 |
|                    | S625       | OQ702196 |                           | S98        | OQ656408 |
|                    | S214       | OQ702197 |                           | S264       | OQ702130 |
|                    | S409       | OQ702198 |                           | S316       | OQ702131 |
|                    | S428       | OQ702199 |                           | S389       | OQ702132 |
|                    | S429       | OQ702200 |                           | S390       | OQ702133 |
|                    | S706       | OQ702201 | <i>F. verticillioides</i> | CBS 218.76 | MW402113 |
|                    | S807       | OQ702202 |                           | S86        | OQ702164 |
|                    | S829       | OQ702203 |                           | S66        | OQ702166 |
|                    | S85        | OQ702204 |                           | S62        | OQ702167 |
|                    | S192       | OQ702251 |                           | S574       | OQ702168 |
|                    | S718       | OQ702252 |                           | S53        | OQ702169 |
| <i>F. andiyazi</i> | NRRL 31727 | MN193854 |                           | S259       | OQ702170 |
|                    | S104       | OQ656380 |                           | S136       | OQ702171 |
|                    | S133       | OQ656381 | <i>F. globosum</i>        | NRRL 26131 | KF466417 |
|                    | S139       | OQ656382 | <i>F. lactis</i>          | NRRL 25200 | MN193862 |
|                    | S158       | OQ656383 | <i>F. madaense</i>        | CBS 146669 | MW402098 |
|                    | S241       | OQ656384 | <i>F. musae</i>           | NRRL 25059 | FN552086 |
|                    | S265       | OQ656385 | <i>F. nygamai</i>         | CBS 749.97 | MW402151 |
|                    | S282       | OQ656386 | <i>F. siculi</i>          | CPC 27188  | LT746214 |
|                    | S315       | OQ656387 | <i>F. anthophilum</i>     | CBS 222.76 | MW402114 |
|                    | S360       | OQ656388 | <i>F. pseudonygamai</i>   | NRRL13592  | AF160263 |
|                    | S367       | OQ656389 | <i>F. bulbicola</i>       | NRRL 13618 | KF466415 |
|                    | S367       | OQ656389 | <i>F. fractiflexum</i>    | NRRL 28852 | AF160288 |

---
